# Supplementary material
Source: PubMed Central journal article supplement (PMC5210756)
Supplement: supp_pp.16.01585_PP2016-01585DR1_Supplemental_Material_Tables_and_Figures.pdf [file supp_pp.16.01585_PP2016-01585DR1_Supplemental_Material_Tables_and_Figures.pdf]

1 **Supplementary Table S1**

2 Coefficients,  $r^2$  value, and the irradiance at which  $J_{NPQ}/ETR=1$  presented from polynomial  
3 regression ( $y=ax^2+bx+c, c=0$ ) applied to the dataset for each cultivar in Figure 8.

| Cultivar    | Coefficient a | Coefficient b | $r^2$ | Irradiance where<br>$J_{NPQ}/ETR = 1, (\mu\text{mols m}^{-2} \text{s}^{-1})$ |
|-------------|---------------|---------------|-------|------------------------------------------------------------------------------|
| Azucena     | 9.78          | 2.4           | 0.92  | 817.04                                                                       |
| MAGIC       | 1.09          | 1.74          | 0.86  | 814.04                                                                       |
| Moroberekan | 9.12          | -2.04         | 0.85  | 1125.22                                                                      |
| IR64-21     | 2.003         | -1.9          | 0.9   | 565.06                                                                       |

4  
5  
6  
7  
8  
9  
10  
11  
12  
13  
14  
15  
16  
17  
18  
19  
20  
21  
22

23 **Supplementary Table S2**

24 Plant architectural measurements made in 5 cultivars of *Oryza sativa* grown and analysed in  
 25 quarantine glasshouse facilities at CSIRO, Black Mountain, Canberra, Australia. Measurements  
 26 were made by hand at 100 days after sowing (DAS).

| Genotype                        | Plant Height<br>(mm)<br>at 100DAS | Leaf width<br>(mm),<br>Leaf 8 | Leaf angle<br>from stem <sup>a</sup><br>(°) | SPAD <sup>b</sup> | Tillers<br>at 100DAS | <sup>a</sup><br>average<br>of<br>leaf<br>8, 9,<br>10,<br>and<br>11 in<br>all<br>geno<br>types <sup>b</sup> |
|---------------------------------|-----------------------------------|-------------------------------|---------------------------------------------|-------------------|----------------------|------------------------------------------------------------------------------------------------------------|
| Azucena                         | 1203.75 ± 15.6                    | 15.25 ± 0.9                   | 18.75 ± 1.3                                 | 37.75 ± 0.6       | 11 ± 0.4             | 27                                                                                                         |
| IR64-21                         | 700 ± 7.4                         | 9.25 ± 0.5                    | 32.5 ± 1.3                                  | 42.63 ± 0.9       | >15                  | 28                                                                                                         |
| Moroberekan                     | 1168.75 ± 28.6                    | 15 ± 0.4                      | 23.75 ± 1.4                                 | 36.58 ± 0.7       | >9 ± 0.4             | 29                                                                                                         |
| Nipponbare                      | 765 ± 9.3                         | 11 ± 0.4                      | 31.25 ± 1.2                                 | 36.9 ± 1.7        | >15                  | 30                                                                                                         |
| MAGIC                           | 732.5 ± 11.3                      | 8.5 ± 0.3                     | 30 ± 0                                      | 41.92 ± 0.7       | >15                  | 31                                                                                                         |
| <i>Significance<sup>c</sup></i> | <i>p</i> <0.001                   | <i>p</i> <0.001               | <i>p</i> <0.001                             | <i>p</i> <0.01    |                      | 32                                                                                                         |

40 *SPAD gives surrogate leaf chlorophyll with non destructive measurement. See section 2.6. Unit is arbitrary,*  
 41 *proportional to chlorophyll content.*

42 <sup>c</sup>*single factor ANOVA variation between genotypes.*

43  
44  
45  
46  
47  
48  
49  
50  
51  
52  
53  
54  
55  
56  
57  
58  
59

60 **Supplementary Table S3**

61 Absorption values for 5 cultivars of *Oryza sativa*. Calculations are made from measurements of  
62 four repetitions of leaf 8, with an integrating sphere (ASD Inc. Boulder, CO, USA) across the full  
63 spectrum (400-2500 nm). Presented values are the average across the PAR spectrum range (460-  
64 700 nm) with the standard error of the mean for the averaged value. Calculations are given in  
65 supplementary Appendix.

| Cultivar    | Absorption value |
|-------------|------------------|
| Azucena     | 0.84 ± 0.0036    |
| IR64-21     | 0.84 ± 0.033     |
| MAGIC       | 0.85 ± 0.0066    |
| Moroberekan | 0.87 ± 0.0059    |
| Nipponbare  | 0.84 ± 0.0029    |

66  
67  
68  
69  
70  
71  
72  
73  
74  
75  
76  
77  
78  
79  
80  
81  
82  
83  
84

85 **Supplementary figures**

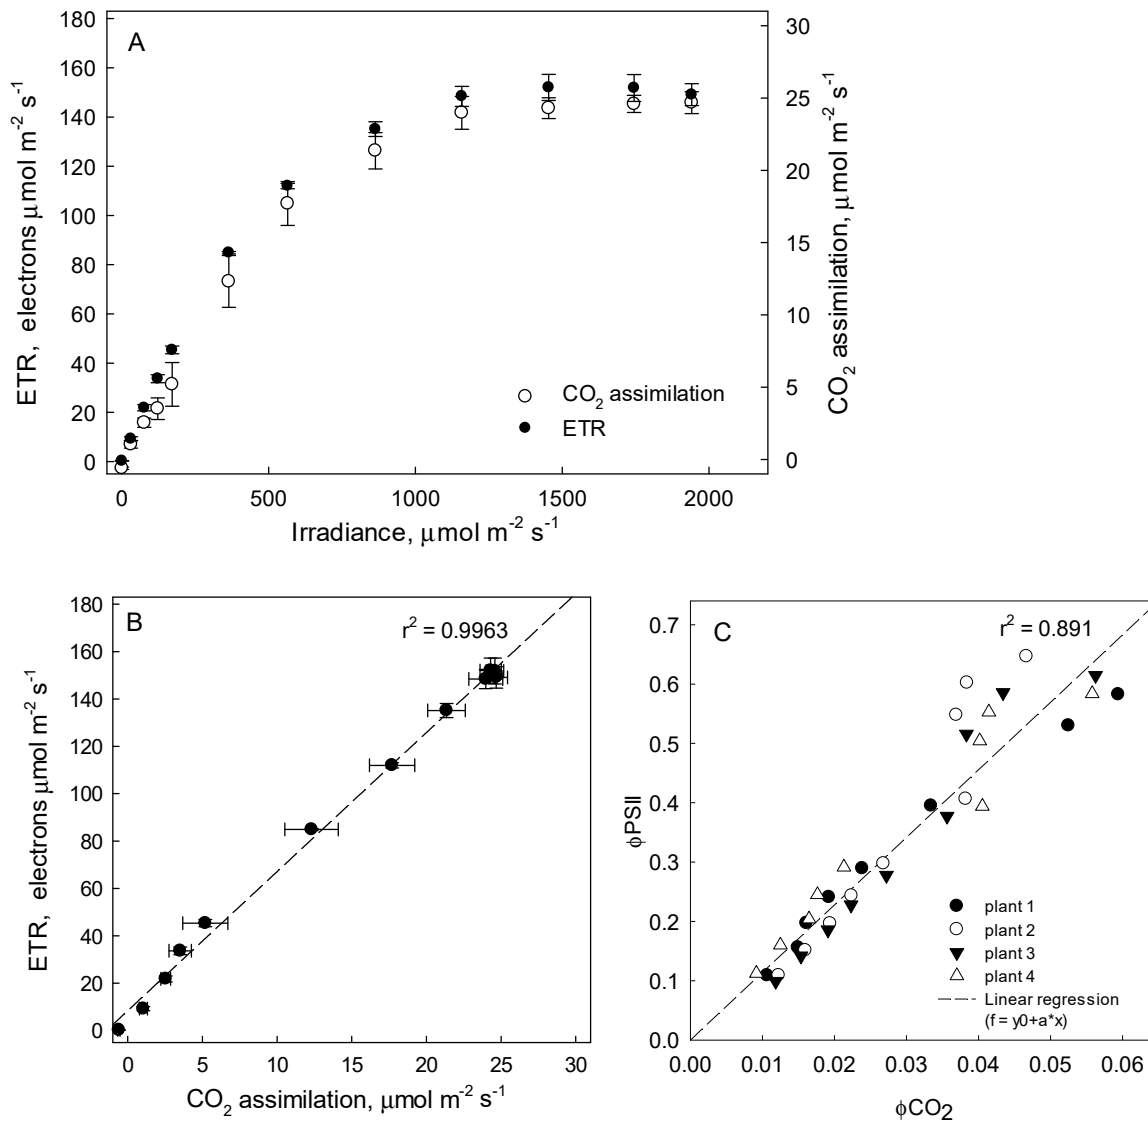

86

87

88 **Figure S1**

89

90 The response of  $\text{CO}_2$  assimilation and ETR to irradiance in leaf 8 on four plants of Nipponbare (A).  
 91 Conventional light response curves (total time 40mins) were made with LiCor fluorescence  
 92 chamber head (0-2000  $\mu\text{mol m}^{-2} \text{s}^{-1}$  irradiance at 25°C with 400  $\mu\text{mol/mol CO}_2$ ) n=4. The  
 93 relationship between ETR and  $\text{CO}_2$  assimilation, regression  $f=8.46+5.87*x$  (B) and the relationship  
 94 between  $\phi\text{PSII}$  and  $\phi\text{CO}_2$ , regression  $f=0.015+10.99*x$  (C) was calculated for the curves in panel  
 95 A.

96

97

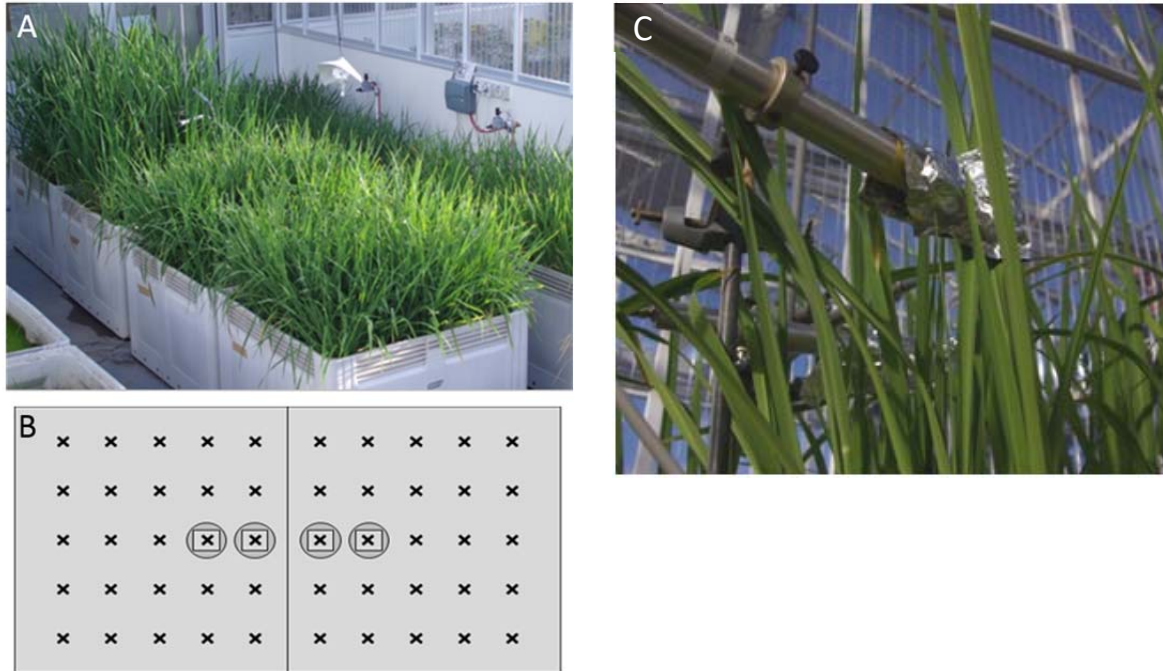

98

99

100 **Figure S2**

101 Mini canopies of *Oryza sativa*, sown in a controlled environment glasshouse at CSIRO, Black  
102 Mountain, Canberra. Plants were transplanted with 25x25cm spacing, in 650 litre bins  
103 (1162x1162x650mm), into 'puddled' soil (A). In the layout of mini canopies, aerial view, (B), X  
104 represents plants sown directly into soil. X inside squares represents plants sown into smaller pots  
105 (220mm x 220mm, 10 ltr), placed into the soil of larger bin, to allow temporary removal for  
106 architectural analysis of single plants, but to ensure growth in realistic canopy light environment.  
107 Two bins next to each other compose a mini canopy.

108 Monitoring PAM measuring head set to take a conventional light response curve measurement  
109 (C). Aluminium foil blocks out natural intercepted light to allow the actinic light source to apply  
110 increasing irradiance ( $0-1500\mu\text{mol m}^{-2} \text{s}^{-1}$ ) with 3min acclimation time at each irradiance. Rapid  
111 light response curves were made without moving the measuring heads on the same leaf area  
112 measured diurnally.

113

114

115

116

117

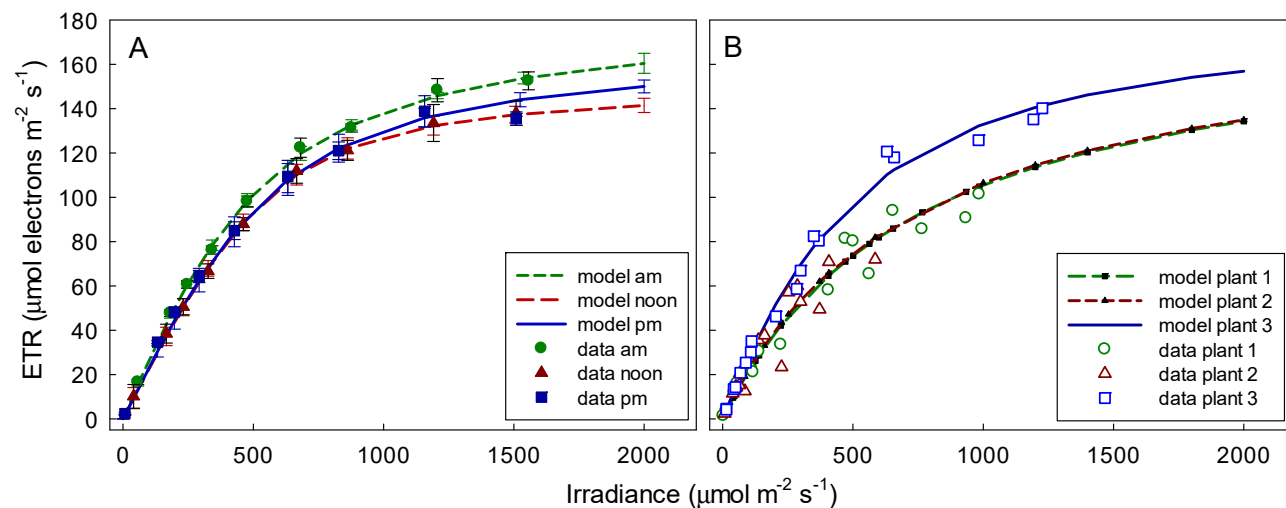119  
120121 **Figure S3**

122 The measured response of ETR to irradiance compared with model predictions in leaf 13 of cv.  
 123 Nipponbare at 122 DAS for conventional light response curves (A) and diurnally from saturating  
 124 PAM fluorescence flashes made at 30 minute intervals throughout the day (B). The model was  
 125 generated with Equation 3 using the Microsoft Excel curve fitting utility attached as supplementary  
 126 material. For the rapid response curve data and model at three timepoints,  $n=3$  (A), while diurnal  
 127 measurements from leaf 13 of three plants are shown individually (B).

128

129

130

131

132

133

134

135

136

137

138

139

140

141

142

143 **Supplementary Appendix**

144 **Calculation of leaf absorption values with an integrating sphere and Fieldspec4 (*Analytical Spectral***  
145 ***Devices (ASD) Inc., Boulder, CO, USA*).**

146 Leaf 8 from 4 plants of 5 cultivars of *Oryza sativa* (Azucena, IR64-21, Moroberekan, Nipponbare and  
147 MAGIC), were analysed with the integrating sphere. Fractionating reflection and transmittance across  
148 the PAR spectrum (400-700nm) allowed calculation of absorption in the PAR range with for each  
149 genotype according to:

150 
$$\alpha\lambda = 1 - \rho\lambda - \tau$$

151 Where ( $\rho\lambda$ ) is radiation reflected or transmitted ( $\tau\lambda$ ) transmitted and ( $\alpha\lambda$ ) is absorption

152 The device was set up and located outside of the glasshouse, in the adjacent anteroom in darkened  
153 conditions. To make a measurement, a leaf was detached from the plant in a mini canopy in the glass  
154 house.

155 The device was set to make measurements in 'ratio mode', and for greater accuracy a stray light  
156 measurement was made across the full spectrum prior to measurement on each leaf. Thus the  
157 reflectance value as a ratio of total radiation at a given wavelength was calculated as:

$$R_s = \frac{(R'_s - R_d) \cdot R_r}{(1 - R_d)}$$

158 where  $R_s$  is the corrected sample reflectance,  $R'_s$  is measured sample reflectance,  $R_r$  is reference sample  
159 reflectance, and  $R_d$  is the stray light measurement.

160 In a similar way, but with a dark reading rather than a stray light measurement, transmittance value for  
161 each wavelength was calculated as:

$$T = \frac{(I_s - I_d) \cdot R_r}{(1 - I_d)}$$

162 where  $T$  is corrected transmittance,  $I_s$  is the transmittance sample measurement, and  $I_d$  is the  
163 transmittance dark reading. Stray light measurements were always below 0.08, and dark measurements  
164 always below 0.009, and considered very low.

165 An average of the absorption values in the PAR spectrum only were used to calculate leaf absorption.

166
